# Supplementary material
Source: ML conference proceedings conference paper supplement (https://openreview.net/forum?id=kmK3WSCOCT)

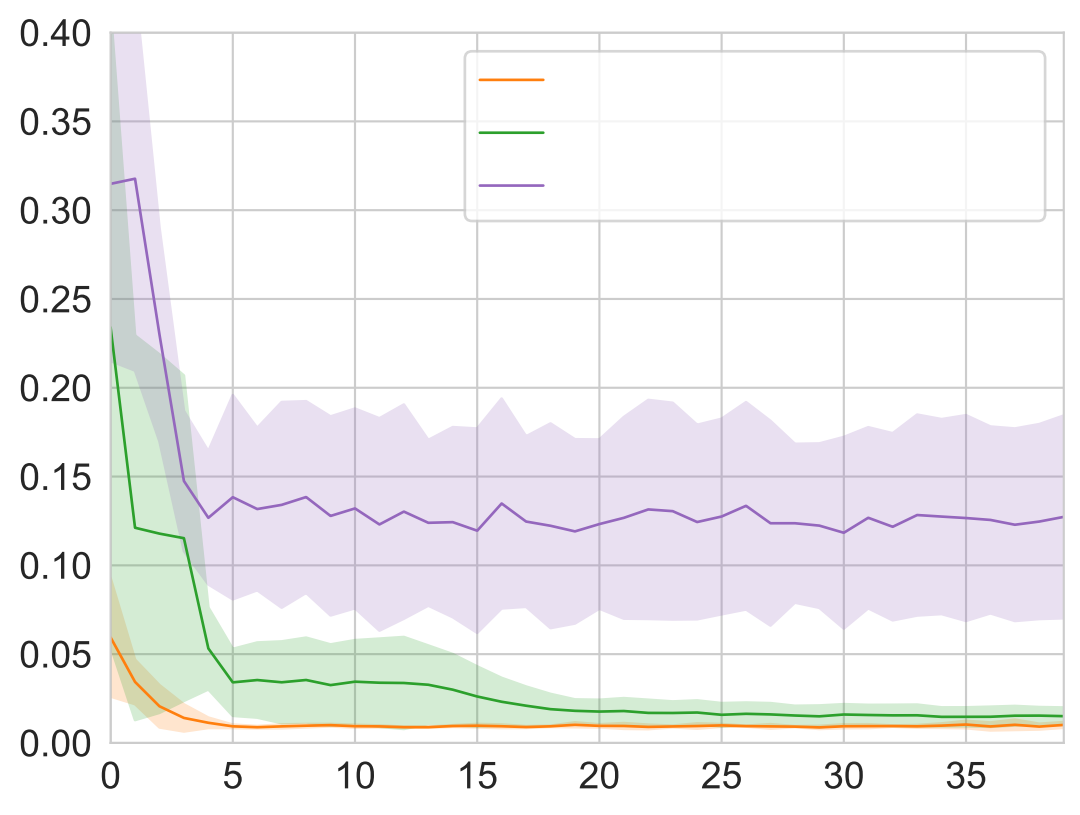

Supplement: supplementary_material [file conv-no-conv.pdf › Markov-Mamba-States/figures/conv-no-conv.pdf]

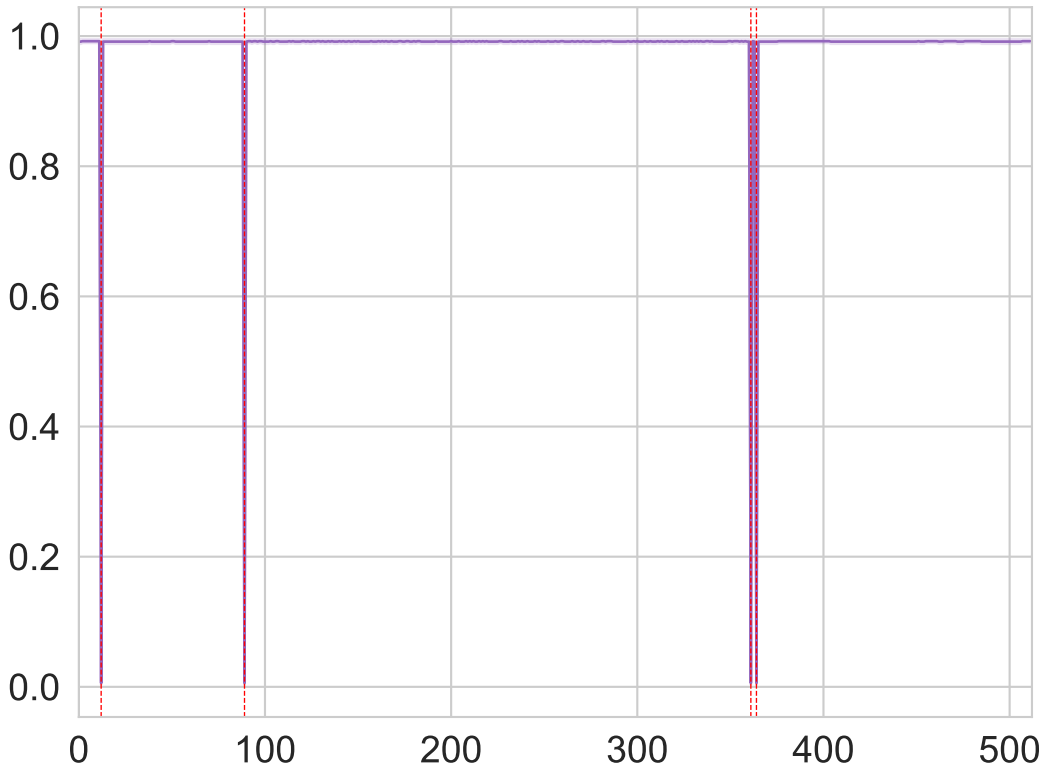

Supplement: supplementary_material [file switch-at.pdf › Markov-Mamba-Switch/figures/switch-at.pdf]

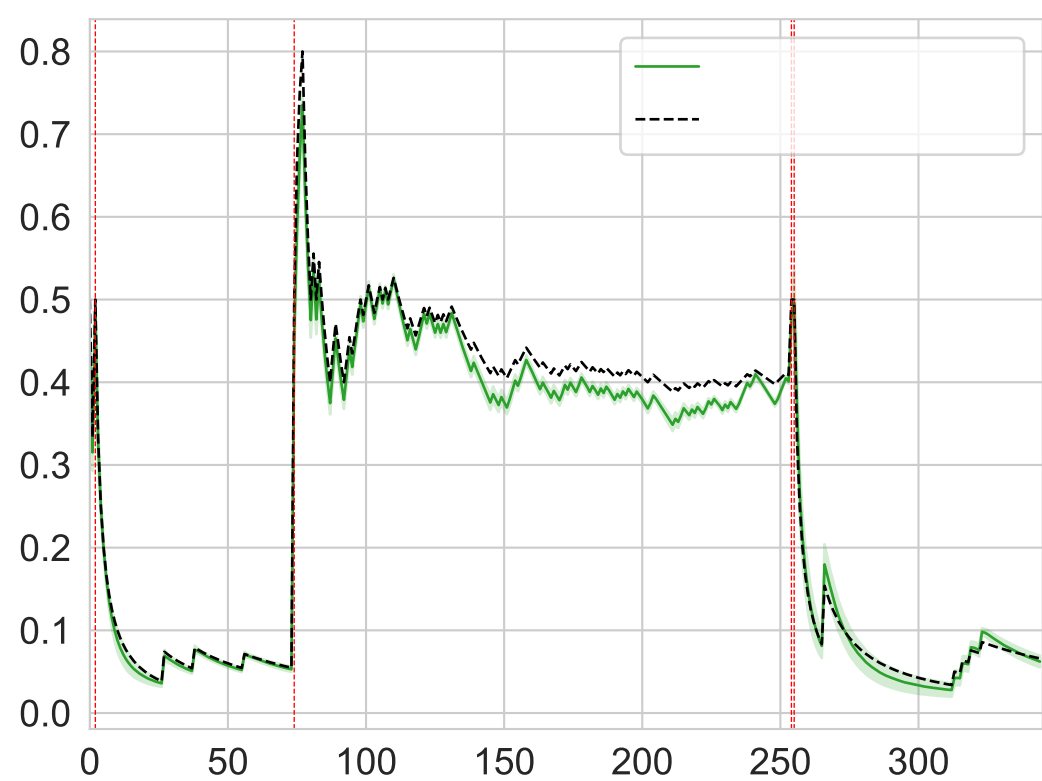

Supplement: supplementary_material [file switch-estimator.pdf › Markov-Mamba-Switch/figures/switch-estimator.pdf]

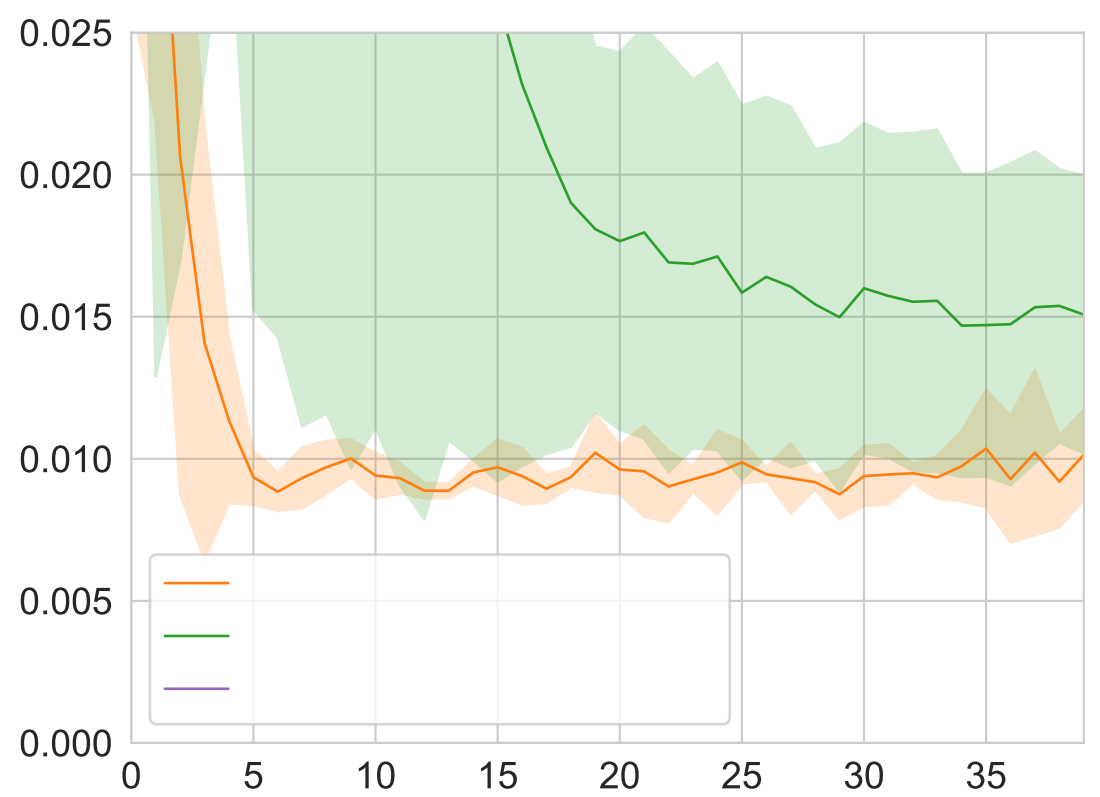

Supplement: supplementary_material [file conv-no-conv.pdf › Markov-Mamba/figures/conv-no-conv.pdf]

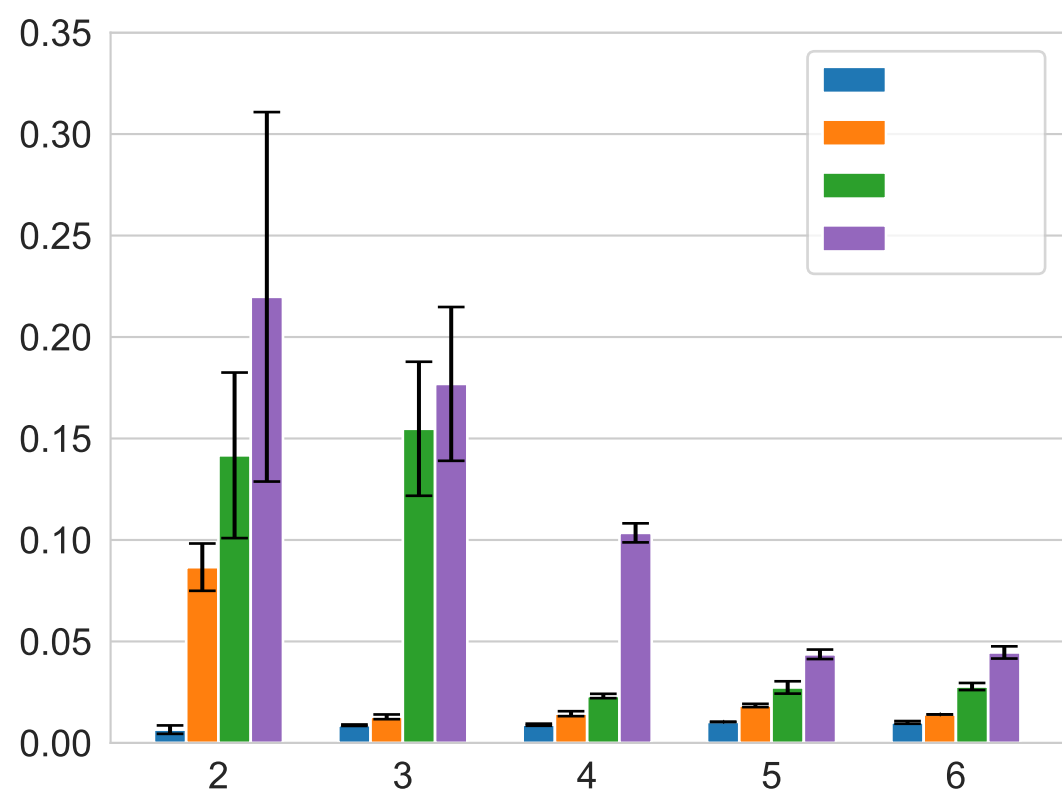

Supplement: supplementary_material [file conv-order.pdf › Markov-Mamba/figures/conv-order.pdf]

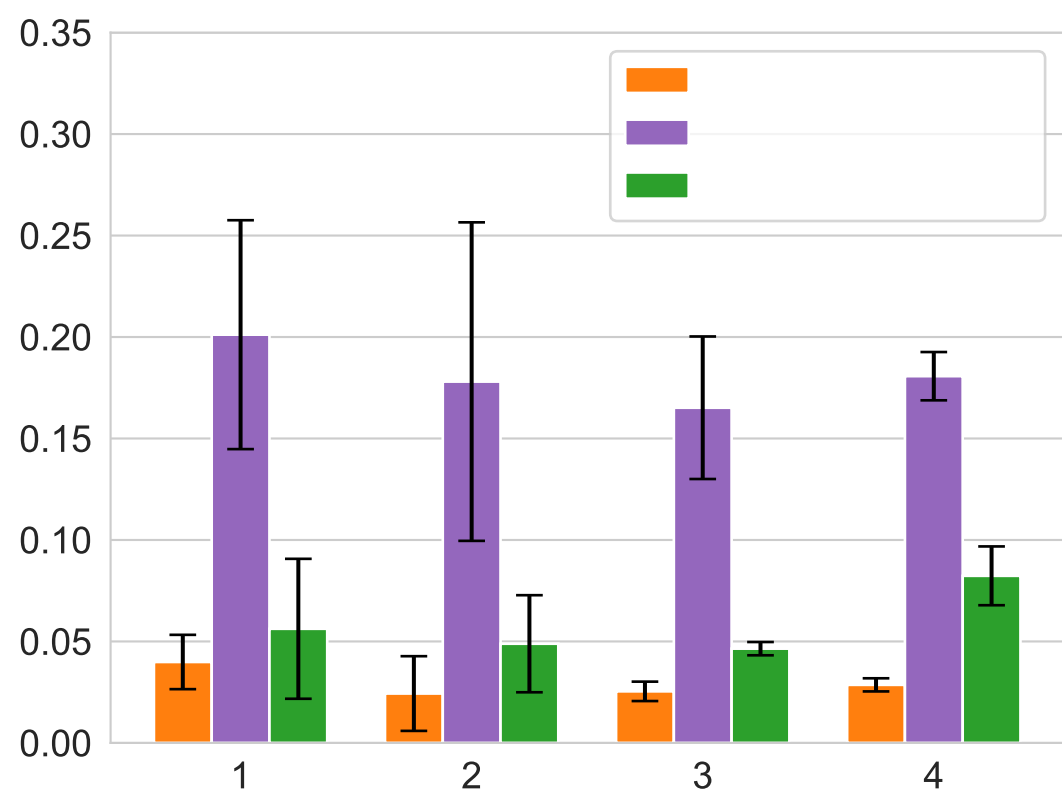

Supplement: supplementary_material [file estimator-norm.pdf › Markov-Mamba/figures/estimator-norm.pdf]

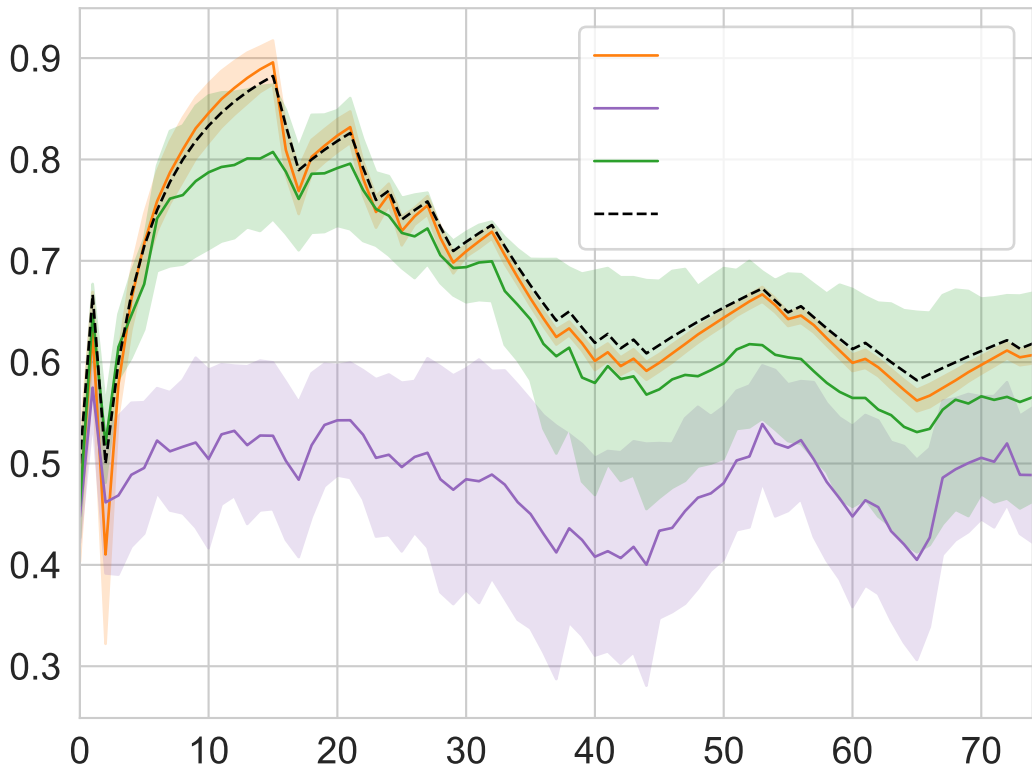

Supplement: supplementary_material [file estimator.pdf › Markov-Mamba/figures/estimator.pdf]
